# Supplementary material
Source: PubMed Central journal article supplement (PMC7957952)
Supplement: NIHMS1675751-supplement-1.pdf [file NIHMS1675751-supplement-1.pdf]

1 **SUPPLEMENTAL MATERIAL**

## 2 Supplemental Table 1. ICD9 and ICD10 Codes

3

---

**A. Codes used to define hospitalizations with mitral valve interventions**


---



---

Mitral Valve **ICD9 Procedure Codes**

Replacement 3523, 3524

## ICD10 Procedure Codes

02RG08Z, 02RG0KZ, 02RG38Z, 02RG3KZ, 02RG48Z, 02RG4KZ,  
02RG0JZ, 02RG3JZ, 02RG4JZ

---

Mitral Valve **ICD9 Procedure Codes**

Repair 3512, 3533

## ICD10 Procedure Codes

02QG0ZZ, 02QG3ZZ, 02QG4ZZ, 027G04Z, 027G0DZ, 027G0ZZ,  
027G34Z, 027G3DZ, 027G3ZZ, 027G44Z, 027G4DZ, 027G4ZZ,  
02NG0ZZ, 02NG3ZZ, 02NG4ZZ, 02VG0ZZ, 02VG3ZZ, 02VG4ZZ,  
02UG0JZ, 02UG4JZ

---

MitraClip **ICD9 Procedure Codes**

3597

## ICD10 Procedure Codes

02UG3JZ

---

---

**A. Codes used to define mitral valve etiology**

---

Rheumatic Heart Disease      ICD9 Diagnosis Codes  
394, 3940, 3941, 3942, 3949, 396, 3960, 3961, 3962, 3963, 3968, 3969,  
3940, 3942, 3960, 3961

ICD10 Diagnosis Codes  
I051, I052, I058, I059, I080, I081, I083, I088, I089

---

Endocarditis (exclusion criteria)      ICD9 Diagnosis Codes  
421, 4210, 4211, 4219, 4249, 42490, 42491, 42499, 11281, 07422

ICD10 Diagnosis Codes  
I330, I39, I339, I38, B376, B3321

---

Mitral Regurgitation      ICD9 Diagnosis Codes  
3941, 3942, 3949, 3962, 3963, 3968, 4240, 7466

ICD10 Diagnosis Codes  
I051, I052, I080, I081, I083, I088, I340, Q233

---

Mitral Stenosis (exclusion criteria)      ICD9 Diagnosis Codes  
3940, 3960, 3961, 7465

ICD10 Diagnosis Codes  
I050, I342, Q232

---

---

**B. Codes used to define concomitant procedures**

---

CABG

ICD9 Procedure Codes

4148, 3610, 3611, 3612, 3613, 3614, 3615, 3616, 3617, 3619, 0066,  
1755, 3601, 3602, 3603, 3604, 3605, 3606, 3607, 3608, 3609

ICD10 Procedure Codes

0212083, 0212088, 0212089, 021208C, 021208F, 021208W, 0212093,  
0212098, 0212099, 021209C, 021209F, 021209W, 02120A3, 02120A8,  
02120A9, 02120AC, 02120AF, 02120AW, 02120J3, 02120J8, 02120J9,  
02120JC, 02120JF, 02120JW, 02120K3, 02120K8, 02120K9, 02120KC,  
02120KF, 02120KW, 02120Z3, 02120Z8, 02120Z9, 02120ZC,  
02120ZF, 0213083, 0213088, 0213089, 021308C, 021308F, 021308W,  
0213093, 0213098, 0213099, 021309C, 021309F, 021309W, 02130A3,  
02130A8, 02130A9, 02130AC, 02130AF, 02130AW, 02130J3, 02130J8,  
02130J9, 02130JC, 02130JF, 02130JW, 02130K3, 02130K8, 02130K9,  
02130KC, 02130KF, 02130KW, 02130Z3, 02130Z8, 02130Z9,  
02130ZC, 02130ZF, 0211083, 0211088, 0211089, 021108C, 021108F,  
021108W, 0211089, 0211098, 0211099, 021109C, 021109F, 021109W,  
02110A3, 02110A8, 02110A9, 02110AC, 02110AF, 02110AW,  
02110J3, 02110J8, 02110J9, 02110JC, 02110JF, 02110JW, 02110K3,  
02110K8, 02110K9, 02110KC, 02110KF, 02110KW, 02110Z3,  
02110Z8, 02110Z9, 02110ZC, 02110ZF, 0210083, 0210088, 0210089,

---

---

021008C, 021008F, 021008W, 0210093, 0210098, 0210099, 021009C,  
021009F, 021009W, 02100A3, 02100A8, 02100A9, 02100AC,  
02100AF, 02100AW, 02100J3, 02100J8, 02100J9, 02100JC, 02100JF,  
02100JW, 02100K3, 02100K8, 02100K9, 02100KC, 02100KF,  
02100KW, 02100Z3, 02100Z8, 02100Z9, 02100ZC, 02100ZF, 0212344,  
02123D4, 0212444, 0212483, 0212488, 0212489, 021248C, 021248F,  
021248W, 0212493, 0212498, 0212499, 021249C, 021249F, 021249W,  
02124A3, 02124A8, 02124A9, 02124AC, 02124AF, 02124AW,  
02124J3, 02124J8, 02124J9, 02124JC, 02124JF, 02124JW, 02124K3,  
02124K8, 02124K9, 02124KC, 02124KF, 02124KW, 02124Z3,  
02124Z8, 02124Z9, 02124ZC, 02124ZF, 0213344, 02133D4, 0213444,  
0213483, 0213488, 0213489, 021348C, 021348F, 021348W, 0213493,  
0213498, 0213499, 021349C, 021349F, 021349W, 02134A3, 02134A8,  
02134A9, 02134AC, 02134AF, 02134AW, 02134D4, 02134J3, 02134J8,  
02134J9, 02134JC, 02134JF, 02134JW, 02134K3, 02134K8, 02134K9,  
02134KC, 02134KF, 02134KW, 02134Z3, 02134Z8, 02134Z9,  
02134ZC, 02134ZF, 0211344, 02113D4, 0211444, 0211483, 0211488,  
0211489, 021148C, 021148F, 021148W, 0211493, 0211498, 0211499,  
021149C, 021149F, 021149W, 02114A3, 02114A8, 02114A9,  
02114AC, 02114AF, 02114AW, 02114D4, 02114J3, 02114J8, 02114J9,  
02114JC, 02114JF, 02114JW, 02114K3, 02114K8, 02114K9, 02114KC,  
02114KF, 02114KW, 02114Z3, 02114Z8, 02114Z9, 02114ZC,

---

---

02114ZF, 0210344, 02103D4, 0210444, 0210483, 0210488, 0210489,  
021048C, 021048F, 021048W, 0210493, 0210498, 0210499, 021049C,  
021049F, 021049W, 02104A3, 02104A8, 02104A9, 02104AC,  
02104AF, 02104AW, 02104D4, 02104J3, 02104J3, 02104J8, 02104J9,  
02104JC, 02104JF, 02104JW, 02104K3, 02104K3, 02104K8, 02104K9,  
02104KC, 02104KF, 02104KW, 02104Z3, 02104Z8, 02104Z9,  
02104ZC, 02104ZF

---

Aortic Valve  
Replacement

ICD9 Procedure Codes  
3521, 3522, 3505, 3506

ICD10 Procedure Codes

02RF0, 02RF07, 02RF07Z, 02RF08, 02RF08Z, 02RF0J, 02RF0JZ,  
02RF0K, 02RF0KZ, 02RF3, 02RF37, 02RF37H, 02RF37Z, 02RF38,  
02RF38H, 02RF38Z, 02RF3J, 02RF3JH, 02RF3JZ, 02RF3K, 02RF3KH,  
02RF3KZ, 02RF4, 02RF47, 02RF47Z, 02RF48, 02RF48Z, 02RF4J,  
02RF4JZ, 02RF4K, 02RF4KZ

---

Tricuspid Valve  
Replacement

ICD9 Procedure Codes  
3527, 3528

ICD10 Procedure Codes

02RJ07Z, 02RJ08Z, 02RJ0JZ, 02RJ0KZ

---

---

|                   |                                    |
|-------------------|------------------------------------|
| Procedures on the | ICD9 Procedure Codes               |
| Aorta             | 3804, 3814, 3834, 3844, 3845, 3864 |

ICD10 Procedure Codes

025W, 025W0, 025W0Z, 025W0ZZ, 025W3, 025W3Z, 025W3ZZ,  
025W4, 025W4Z, 025W4ZZ, 025X, 025X0, 025X0Z, 025X0ZZ, 025X3,  
025X3Z, 025X3ZZ, 025X4, 025X4Z, 025X4ZZ, 027W, 027W0,  
027W04, 027W04Z, 027W0D, 027W0DZ, 027W0Z, 027W0ZZ, 027W3,  
027W34, 027W34Z, 027W3D, 027W3DZ, 027W3Z, 027W3ZZ, 027W4,  
027W44, 027W44Z, 027W4D, 027W4DZ, 027W4Z, 027W4ZZ, 027X,  
027X0, 027X04, 027X04Z, 027X0D, 027X0DZ, 027X0Z, 027X0ZZ,  
027X3, 027X34, 027X34Z, 027X3D, 027X3DZ, 027X3Z, 027X3ZZ,  
027X4, 027X44, 027X44Z, 027X4D, 027X4DZ, 027X4Z, 027X4ZZ,  
02BW, 02BW0, 02BW0Z, 02BW0ZX, 02BW0ZZ, 02BW3, 02BW3Z,  
02BW3ZX, 02BW3ZZ, 02BW4, 02BW4Z, 02BW4ZX, 02BW4ZZ,  
02BX, 02BX0, 02BX0Z, 02BX0ZX, 02BX0ZZ, 02BX3, 02BX3Z,  
02BX3ZX, 02BX3ZZ, 02BX4, 02BX4Z, 02BX4ZX, 02BX4ZZ, 02CW,  
02CW0, 02CW0Z, 02CW0ZZ, 02CW3, 02CW3Z, 02CW3ZZ, 02CW4,  
02CW4Z, 02CW4ZZ, 02CX, 02CX0, 02CX0Z, 02CX0ZZ, 02CX3,  
02CX3Z, 02CX3ZZ, 02CX4, 02CX4Z, 02CX4ZZ, 02QW, 02QW0,  
02QW0Z, 02QW0ZZ, 02QW3, 02QW3Z, 02QW3ZZ, 02QW4,  
02QW4Z, 02QW4ZZ, 02QX, 02QX0, 02QX0Z, 02QX0ZZ, 02QX3,

---

---

02QX3Z, 02QX3ZZ, 02QX4, 02QX4Z, 02QX4ZZ, 02RW, 02RW0,  
02RW07, 02RW07Z, 02RW08, 02RW08Z, 02RW0JZ, 02RW0K,  
02RW0KZ, 02RW4, 02RW47, 02RW47Z, 02RW48, 02RW48Z,  
02RW4J, 02RW4JZ, 02RW4K, 02RW4KZ, 02RX, 02RX0, 02RX07,  
02RX07Z, 02RX08, 02RX08Z, 02RX0J, 02RX0JZ, 02RX0K,  
02RX0KZ, 02RX4, 02RX47, 02RX47Z, 02RX48, 02RX48Z, 02RX4J,  
02RX4JZ, 02RX4K, 02RX4KZ, 02UW, 02UW0, 02UW07, 02UW07Z,  
02UW08, 02UW08Z, 02UW0JZ, 02UW0K, 02UW0KZ, 02UW3,  
02UW3, 02UW37Z, 02UW38, 02UW38Z, 02UW3J, 02UW3JZ,  
02UW3K, 02UW3KZ, 02UW4, 02UW47, 02UW47Z, 02UW48,  
02UW48Z, 02UW4J, 02UW4JZ, 02UW4K, 02UW4KZ, 02UX, 02UX0,  
02UX07, 02UX07Z, 02UX08, 02UX08Z, 02UX0J, 02UX0JZ, 02UX0K,  
02UX0KZ, 02UX3, 02UX37, 02UX37Z, 02UX38, 02UX38Z, 02UX3J,  
02UX3JZ, 02UX3K, 02UX3KZ, 02UX4, 02UX47, 02UX47Z, 02UX48,  
02UX48Z, 02UX4J, 02UX4JZ, 02UX4K, 02UX4KZ'

---

6 **Supplemental Figure 1.** Distribution of Mitral Valve Interventions from 2000-2016 in Patients with Concomitant CABG

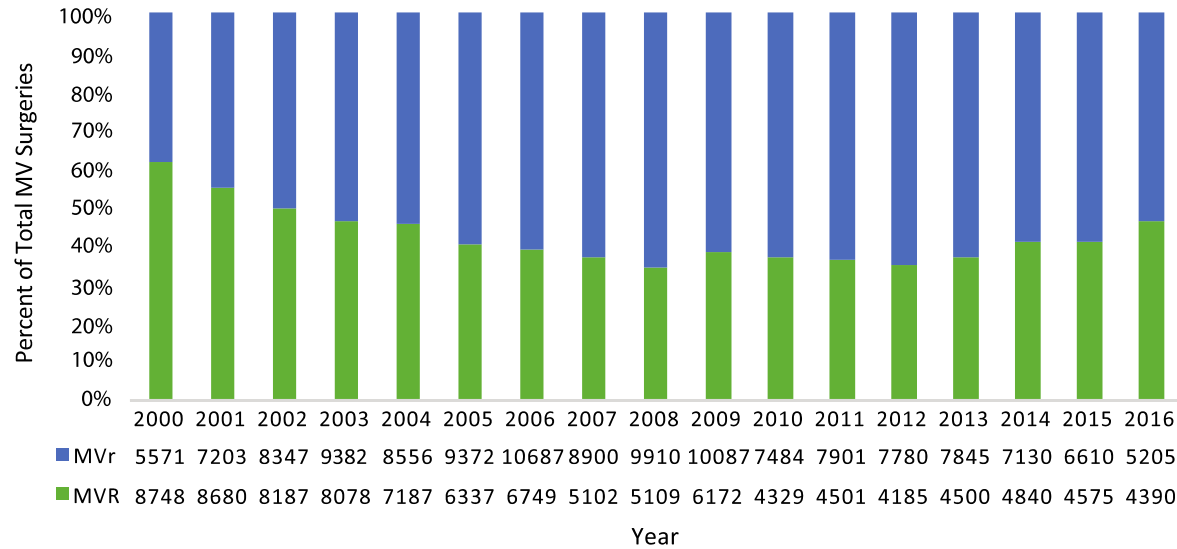

7  
8 MVR as a proportion of total MV surgeries with concomitant CABG decreased an average 6.6% per year from 2000-2008 (P<0.001),  
9 but after 2008 it increased an average 2.9% per year (P=0.004). MVr increased from 2000-2007 (APC=13.8 from 2000-2002, P=0.03;  
10 APC=4.8 from 2003-2007, P=0.01), after which it decreased but not reaching statistical significance (APC=-0.1 from 2008-2013,  
11 P=0.9; APC=-4.8 from 2014-2016, P=0.1).  
12 MVR = mitral valve replacement; MVr = mitral valve repair; CABG = coronary artery bypass surgery

13  
14  
15  
16  
17  
18  
19  
20  
21



22 **Supplemental Table 2.** Confirmatory Analysis of Trends in In-hospital Mortality by Mitral Valve Intervention. Odds ratios were  
 23 estimated by fitting multilevel regression model for complex survey data and adjusting for patient age, gender, type of admission and  
 24 comorbidities.  
 25

|                                | <b>Odds Ratio</b> | <b>95 % CL</b> |
|--------------------------------|-------------------|----------------|
| <b>MVR</b>                     | 0.95              | 0.95-0.96      |
| <b>MV Repair</b>               | 0.93              | 0.92-0.94      |
| <b>MitraClip</b>               | 0.82              | 0.56-1.19      |
| <b>Isolated MVR</b>            | 0.92              | 0.90-0.94      |
| <b>Isolated MV Repair</b>      | 0.94              | 0.93-0.94      |
| <b>Any Mitral Intervention</b> | 0.94              | 0.93-0.94      |

26 We observed the decrease in the odds of in-hospital mortality for mitral valve interventions by 6 percent per years from 2000 to 2016.  
 27 Similar trends were observed for isolated mitral valve repair and for isolated mitral valve replacement.  
 28  
 29  
 30  
 31

32 **Supplemental Table 3.** Regional Variation in Trends and Usage of Mitral Valve Procedures  
 33

|                           | <b>Northeast</b> | <b>Midwest</b>    | <b>South</b> | <b>West</b> | <b>P-value<br/>(between regions)</b> |
|---------------------------|------------------|-------------------|--------------|-------------|--------------------------------------|
| <b>Isolated MVR</b>       |                  |                   |              |             |                                      |
| <b>APC</b>                | -2.2**           | -0.7 <sup>+</sup> | -6.8***      | -1.3*       | <0.001                               |
| <b>Rate, %</b>            | 43               | 40                | 44           | 41          | <0.001                               |
| <b>Isolated MVr</b>       |                  |                   |              |             |                                      |
| <b>APC</b>                | 3.4***           | 5.1**             | 3.0***       | 3.2***      | <0.001                               |
| <b>Rate, %</b>            | 49               | 51                | 45           | 45          | <0.001                               |
| <b>Isolated MitraClip</b> |                  |                   |              |             |                                      |
| <b>APC</b>                | 79.5*            | 80.2*             | 81.7*        | 88.7*       | 0.15                                 |
| <b>Rate, %</b>            | 8                | 9                 | 10           | 14          | <0.001                               |

34 \*\*\* P<0.001, \*\* P<0.01, \*P<0.5, + P≥0.5 for trends within regions

35 Rate by interventions for each region is shown for 2016

36

37 Significant regional variations exist in the usage of mitral valve interventions. All regions had an increase in the prevalence of MVR,  
38 the greatest occurring in the Midwest; while all but the Midwest had a decrease in the prevalence of MVR (Supplemental Table 3).  
39 Mitraclip showed substantial growth in all regions, but the proportion of MitraClip interventions was still a relatively small percentage  
40 of all MV procedures in 2016 (8% in Northeast and 14% of Midwest).

41

42
